# Supplementary material for: Successful Regulatory T Cell‐Based Therapy Relies on Inhibition of T Cell Effector Function and Enrichment of FOXP3+ Cells in a Humanized Mouse Model of Skin Inflammation
Source: Hindawi journal article supplement (doi:10.1155/2020/7680131), 2020-01-01
Supplement: f1 [file 7680131.f1.pdf]

539 **Supplemental figure**

540

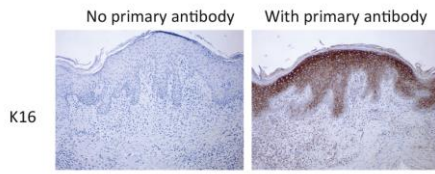

*Immunohistochemistry staining for K16 in the human inflamed skin of humanized mice infused with human PBMC. Sections were stained in the absence or presence of a primary antibody directed against K16 followed by a secondary antibody staining and visualization step.*

541
